# Supplementary material
Source: Springer Nature journal article supplement (https://www.springermedizin.de/resource/supplementary/12884_2009_230_MOESM6_ESM.pdf/9459904)

## بچے کی حرکت سے اس کی خیریت کے بارے میں کیا پتہ چلتا ہے؟

بچے کو آپ سے ضرورت کی تمام چیزیں پلاسیٹا کے ذریعے ملتی ہیں۔ جب تک بچے کو درست فراہمی جاری رہے، اس کی حرکت جاری رہتی ہے۔ اگر پلاسیٹا سے بچے کی ضروریات درست طور پر پوری نہ ہوں یا وہ بیمار ہو جائے تو اسے اپنی نشوونما جاری رکھنے کیلئے اپنی طاقت بچا کر رکھنا پڑتی ہے لہذا اس کی حرکت کم ہو جاتی ہے۔ اگر آپ تمباکو نوشی کرتی ہیں تو اس سے پلاسیٹا اور بچے، دونوں پر اثر پڑے گا اور بچے کی حرکت کم ہو جائے گی۔ اگر پلاسیٹا کے فعل میں شدید خلل پڑ گیا تو نشوونما رک جائے گی اور بچے کے شدید بیماری یا نقائص میں مبتلا ہونے کا خطرہ ہے۔ اس صورت میں بچہ پیدائش کے عمل کو بھی ٹھیک طرح برداشت نہیں کر پاتا۔ اگر بچے کی حرکت نارمل انداز میں جاری رہے تو ایسا بہت ہی کم ہوتا ہے۔

کبھی کبھار بالکل سکون رہتا ہے۔ جو بات اہم ہے، وہ یہ ہے کہ معمول کی حرکت بہت کم ہو جائے۔ جب آپ کو اپنے اندر زندگی کا عام ردھم محسوس ہوتا رہے تو یہ بچے کی خیریت کی علامت ہے۔ بچے کی ضربات محسوس ہونے سے آپ کو اپنے بچے سے مزید لگاؤ محسوس ہوتا ہے۔ اس لئے بچے کی حرکتوں کو گن کر اس کی خیریت معلوم کرتے رہنا اچھا ہے!

### اس لئے ہم حرکات کی گنتی کرتے ہیں!

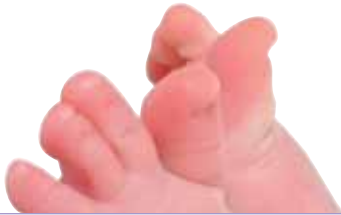

## جب بچہ پیٹ میں ضربات لگائے تو اس کا کیا مطلب ہے؟

### کبھی کبھار حرکت نہیں ہوتی۔۔۔

آپ کا بچہ دن میں کئی مرتبہ سوتا ہے اور تب وہ بالکل پرسکون رہتا ہے۔ حمل کا عرصہ بڑھنے کے ساتھ ساتھ بچے کی نیند کے اوقات بڑھتے جاتے ہیں لیکن ولادت کے قریب آ کر بھی کم ہی ایسا ہوتا ہے کہ بچہ ایک وقت میں ایک گھنٹے سے زیادہ سوئے۔ زیادہ تر بچے شام کے وقت زیادہ چست ہوتے ہیں اور کئی بچے صبح سویرے بھی چست ہوتے ہیں۔

مختلف بچوں کی ”ضربات“ کی کثرت اور طاقت میں بہت فرق ہو سکتا ہے۔ ضربات سے یہاں ہماری مراد ہر قسم کی حرکات ہیں۔ جو بچے زیادہ حرکت کرتے ہیں، وہ اکثر پیدائش کے بعد بھی زیادہ چست رہتے ہیں۔ تاہم وہ بھی اتنے ہی صحتمند ہوتے ہیں۔ لڑکوں اور لڑکیوں میں فرق نہیں پایا جاتا۔

بعض ماؤں کو دوسری ماؤں کی نسبت حرکت اتنی اچھی طرح محسوس نہیں ہوتی۔ اگر پلاسیٹا رحم کے سامنے کی طرف لگا ہوا ہو یا آپ کا جسم بھاری ہو تو آپ کو کم محسوس ہوتا ہے۔ آپ کو جب پیٹ بلتا ہوا نظر آئے تو آپ ساتھ ساتھ حرکت محسوس کرنے کی کوشش کیا کریں۔ جب آپ لیٹی ہوں تو حرکت سب سے زیادہ محسوس ہوتی ہے، کھڑے ہوئے، چلتے ہوئے یا مصروفیت کے دوران حرکت سب سے کم محسوس ہوتی ہے۔

## اپنے بچے سے دوستی کیجئے!

اب آپ کے حمل کو اتنا عرصہ گزر چکا ہے کہ شاید آپ کو بچے کی ضربات یا حرکات محسوس ہوتی ہوں گی۔ معائنہ حمل سے آپ کو بچے کی صحت اور خیریت کا تو پتہ چلتا رہتا ہے لیکن ماں کی حیثیت سے آپ ہی ہیں جو بچے کی پیدائش سے پہلے اس کی سب سے قریبی دوست بن سکتی ہیں۔ بچہ اپنی حرکت کے ذریعے جو کچھ بتاتا ہے، وہ اہم ہے!

ولادت کے بعد آپ کا بہت سا وقت بچے کو سنبھالنے میں گزرا کرے گا۔ ہمارا آپ کو مشورہ ہے کہ آپ حمل کے دوران روزانہ تھوڑا سا وقت اپنے بچے کی حرکتوں کے ذریعے اس سے جان پہچان حاصل کرنے میں گزاریں۔ یہاں آپ کو ایسی معلومات دی جا رہی ہیں کہ بچے کی حرکت کرنے کا کیا مطلب ہے اور یہ رہنمائی کی جا رہی ہے کہ آپ اپنے بچے کی صحت اور اطمینان کا کیسے جائزہ لے سکتی ہیں۔

یہ اچھی عادت ہے کہ اپنے بچے سے جان پہچان بنانے کیلئے کچھ وقت مخصوص رکھا جائے!

### بچہ اندر کیا کر رہا ہے؟

آپ کا بچہ حمل کا تمام عرصہ حرکت کرتا رہتا ہے۔ اس کی سب سے عام حرکت سانس لینے سے واقع ہوتی ہے جو آپ کو محسوس نہیں ہوتی۔ اس طرح پھیپھڑے پھیلتے ہیں اور بچہ پیدائش کے بعد کے وقت کیلئے مشق کرتا رہتا ہے۔ کبھی کبھار اسے ہچکی لگ جاتی ہے جو آپ کو لگاتار ہلکے ہلکے جھٹکوں کی طرح محسوس ہوتی ہے۔

بچہ آپ کے پیٹ میں چھوٹی بڑی، سبھی طرح کی حرکتیں کرتا رہتا ہے۔ ننھی سی گرفت، انگوٹھا چوسنا یا ہاتھوں پیروں کی انگلیوں کو موڑنا اور پھیلانا تو آپ کو محسوس نہیں ہوتا ہو گا۔ البتہ بچے کی بڑی جسمانی حرکات جیسے پاؤں مارنا یا دھکیلنا آپ کو حمل کے آخری حصے میں بڑی اچھی طرح محسوس ہوتی ہیں۔ بڑی جسمانی حرکات تو اکثر واضح ہوتی ہیں اور ایسی صورتوں میں واقع ہوتی ہیں جیسے اگر آپ کھڑی رہنے کے بعد لیٹنے لگیں۔ ایسے میں بچہ تھوڑا سا مڑ جاتا ہے اس لئے اسے اپنی پوزیشن تھوڑی سی بدلتی پڑتی ہے یعنی اگر آپ بچے کو تھوڑا سا دھکیلیں گی تو وہ بھی واپس دھکیلیے گا۔

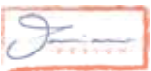

فوٹو : Per Oscar Skjellnan • www.peroscar.no  
ڈیزائن : Marianne Bratt Ricketts • www.mariannedesign.no

[urdu]

# پیت میں بچے کی حرکت محض کھیل اور مزا نہیں

kicks  
count

[www.kickscout.no](http://www.kickscout.no)



## پیٹ میں بچے کی حرکت اور صحت کے باہمی تعلق کے بارے میں تحقیق میں شمولیت

اگر آپ نے ایک بچے کو جنم دیا ہے تو ہم آپ کو دعوت دیتے ہیں کہ بچے کی پیدائش کے بعد آپ یہ فائل مکمل کر کے دے دیں اور اس طرح تحقیق میں شامل ہو جائیں۔ اس سے کوئی فرق نہیں پڑتا کہ آپ نے بچے کی حرکتوں کا چارٹ استعمال کیا ہے یا نہیں۔

کون اور کیوں؟

Folkehelseinstituttet (انسٹیٹوٹ آف پبلک ہیلتھ) ، Rikshospitalet کے دوران حمل طبی حالات کے تحقیقی مرکز یعنی Kvinneklinikken Rikshospitalet-Radiumhospitalet HF ، Perinatalmedisinsk forskningscenter ہسپتالوں سے منسلک خواتین کلینک اور Sanitetskvinnene (نارویجن عورتوں کی تنظیم برائے عوامی صحت) کے تحت یہ تحقیق کی جا رہی ہے کہ پیٹ میں بچوں کی حرکت اور ان کی آئندہ صحت کا آپس میں کیا تعلق ہے۔ ہم جانتے ہیں کہ حرکت میں شدید کمی آنے یا حرکت بند ہو جانے سے بیماری اور موت کا خطرہ ہوتا ہے لیکن ہمیں اس بارے میں زیادہ علم نہیں کہ ان معلومات اور پیٹ میں بچے کی حرکت کے بارے میں دیگر معلومات کو مستقبل قریب و بعید میں بچوں کی صحت کے فروغ کیلئے کس طرح استعمال کیا جا سکتا ہے۔ تحقیق میں شامل ہونا آپ کی اپنی مرضی پر منحصر ہے اور آپ خواہ تھوڑی مدد کریں یا زیادہ، ٹھیک ہے۔ تحقیق کیلئے یہ اہم ہے کہ شعبہ پیدائش / زچہ بچہ سے رخصت ہونے سے پہلے زیادہ سے زیادہ عورتیں یہ فائل بھر کر دیں۔ یہ فائل تحقیق کیلئے اس صورت میں بھی فائدہ مند ہے کہ آپ نے حرکتوں کا چارٹ استعمال نہ کیا ہو یا آپ اپنے بارے میں معلومات نہ دینا چاہتی ہوں۔ البتہ آپ جتنی زیادہ معلومات دیں گی، اس کی قدر و قیمت بھی اتنی ہی بڑھ جائے گی۔

اگر آپ کی عمر 18 سال سے کم ہے تو اپنے سرپرستوں سے پوچھئے۔ آپ یوں طے کر سکتی ہیں کہ آپ کس حد تک حصہ لیں گی: کیا آپ اپنا نام خفیہ رکھنا چاہتی ہیں؟

اس صورت میں آپ نیچے دیئے گئے سوالات کا جواب لکھ دیجئے اور یہاں کراس لگا کر اپنی طرف سے اجازت دے دیجئے:

کیا آپ زیادہ مدد کر سکتی ہیں؟

آپ اپنا شناختی (پرسنل) نمبر یہاں درج کر کے اور دستخط کر کے اجازت دے سکتی ہیں کہ آپ کی فائل سے حاصل کردہ معلومات کو میڈیکل رجسٹر پیدائش میں شامل کر لیا جائے:

دستخط: \_\_\_\_\_ شناختی نمبر:

یا

اگر آپ 'ماں اور بچے کے نارویجن سروے' میں حصہ لے رہی ہیں تو آپ اپنا پرسنل نمبر یہاں درج کر کے اور دستخط کر کے یہ اجازت دے سکتی ہیں کہ آپ کی فائل سے معلومات حاصل کر کے سروے میں شامل کر لی جائیں:

دستخط: \_\_\_\_\_ شناختی نمبر:

کیا اس تحقیق میں شامل ہونا محفوظ ہے؟

انسٹیٹوٹ آف پبلک ہیلتھ (Folkehelseinstituttet) کی ذمہ داری ہے کہ آپ کی معلومات کو صیغہ راز میں اور محفوظ رکھے۔ انسٹیٹوٹ نے ڈاٹا کے حصول کے نگران ادارے (Datatilsynet) سے اجازت اور اخلاقیاتی کمیٹی برائے تحقیق (Forskningsetisk komité) سے آپ کے اور آپ کے بچے کے بارے میں معلومات محفوظ رکھنے کیلئے ہدایات حاصل کی ہیں۔ جونہی انسٹیٹوٹ آپ کی معلومات رجسٹر کر لے گا اور جہاں آپ نے معلومات آگے فراہم کرنے کی اجازت دی ہے، وہاں معلومات مہیا کر لے گا تو ان معلومات سے آپ کا نام حذف کر دیا جائے گا۔ اس کا مطلب ہے کہ محققین کو معلومات پہنچنے سے پہلے آپ کی فائل ضائع کر دی جائے گی اور آپ کی شناخت کے بارے میں تمام معلومات غائب کر دی جائیں گی۔

میں فائل کہاں دوں؟

تمام ہسپتالوں کے شعبہ پیدائش اور شعبہ زچہ بچہ میں اس مقصد کیلئے ڈبے موجود ہیں جن پر وضاحت سے لکھا ہوا ہے۔ اگر آپ کو ٹھیک سے سمجھ نہ آئے تو عملے سے پوچھ لیجئے۔

|                                                                                                                                                                                                                                                                                                            |                                                                                                                                   |
|------------------------------------------------------------------------------------------------------------------------------------------------------------------------------------------------------------------------------------------------------------------------------------------------------------|-----------------------------------------------------------------------------------------------------------------------------------|
| آپ کی عمر..... سال <input type="checkbox"/> <input type="checkbox"/>                                                                                                                                                                                                                                       | میں کوئی معلومات نہیں دینا چاہتی..... <input type="checkbox"/>                                                                    |
| حمل سے پہلے آپکا وزن..... پورے کلو <input type="checkbox"/> <input type="checkbox"/> <input type="checkbox"/>                                                                                                                                                                                              | حمل کے کس ہفتے میں آپ نے بچے کو جنم دیا؟.. <input type="checkbox"/> <input type="checkbox"/>                                      |
| آپ کا قد..... پورے سینٹی میٹر <input type="checkbox"/> <input type="checkbox"/> <input type="checkbox"/>                                                                                                                                                                                                   | (ہفتہ 40 میں ولادت ہوتی ہے)                                                                                                       |
| آپ نے بچے کو کیسے جنم دیا؟                                                                                                                                                                                                                                                                                 | عام ولادت (براستہ شرمگاہ)..... <input type="checkbox"/>                                                                           |
| آپ پہلے کتنے بچوں کو جنم دے چکی ہیں؟ <input type="checkbox"/> <input type="checkbox"/>                                                                                                                                                                                                                     | بڑا آپریشن، پہلے سے طے شدہ..... <input type="checkbox"/>                                                                          |
| کیا اس حمل کے آخری ماہ کے دوران آپ سگرٹ پیتی رہی ہیں؟                                                                                                                                                                                                                                                      | بڑا آپریشن جس کا فیصلہ دوران ولادت کیا گیا..... <input type="checkbox"/>                                                          |
| نہیں..... <input type="checkbox"/>                                                                                                                                                                                                                                                                         | بڑا آپریشن جو جلدی میں کرنا پڑا..... <input type="checkbox"/>                                                                     |
| کبھی کبھار..... <input type="checkbox"/>                                                                                                                                                                                                                                                                   | بچے کی جنس لڑکا <input type="checkbox"/> لڑکی <input type="checkbox"/>                                                            |
| روزانہ..... <input type="checkbox"/>                                                                                                                                                                                                                                                                       | پیدائش کے وقت بچے کا وزن <input type="checkbox"/> <input type="checkbox"/> <input type="checkbox"/> <input type="checkbox"/> گرام |
| بچے کی کیفیت؟                                                                                                                                                                                                                                                                                              | بچہ صحت مند تھا..... <input type="checkbox"/>                                                                                     |
| کیا آپکی مادری زبان نارویجن کے سوا کوئی اور ہے؟ ہاں <input type="checkbox"/> نہیں <input type="checkbox"/>                                                                                                                                                                                                 | بچے کو نومولودوں/بچوں کے شعبے میں داخل کیا گیا... <input type="checkbox"/>                                                        |
| اگر ہاں تو کون سی زبان؟ <input type="checkbox"/> | بچہ فوت ہو گیا..... <input type="checkbox"/>                                                                                      |

مدد کیلئے شکریہ!

folkehelseinstituttet

Rikshospitalet - Radiumhospitalet HF

Oversatt ved Tolketjenesten i Oslo.  
November 2005

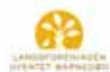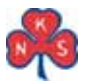

Supplement: MOESM6 [file 9459904]
